# Supplementary material
Source: MDPI journal article supplement (https://www.mdpi.com/1999-4907/14/5/967)
Supplement: s1 [file s1]

## Supplementary Information

**Table S1.** Effects of drought stress on leaf relative water content, leaf plasma-membrane permeability and malondialdehyde content of 50 Chinese fir clones.

| Serial<br>number | Clones<br>number | Leaf Relative Water Content (%) |                     | Leaf Plasma-Membrane Permeability (%) |                      | Malondialdehyde content ( $\mu\text{mol g}^{-1}$ ) |                       |
|------------------|------------------|---------------------------------|---------------------|---------------------------------------|----------------------|----------------------------------------------------|-----------------------|
|                  |                  | Check Treatment                 | Drought Treatment   | Check Treatment                       | Drought Treatment    | Check Treatment                                    | Drought Treatment     |
| 1                | 007              | 65.52±2.04 ab                   | 60.92±1.49 abcde    | 15.98±6.51 cdefghij                   | 50.97±7.12 cdefgh    | 4.47±0.80 acdef                                    | 9.60±1.87 defghijklm  |
| 2                | 014              | 66.66±1.06 ab                   | 61.73±2.39 abcde    | 12.95±1.54 efghij                     | 64.6±1.01 aacdefgh   | 5.39±0.54 acdef                                    | 12.90±1.53 cdefghi    |
| 3                | 017              | 68.34±3.80 ab                   | 54.61±1.92 abcdef   | 18.17±7.98 acdefghij                  | 85.35±10.77 aac      | 4.96±0.79 acdef                                    | 11.52±1.02 cdefghijk  |
| 4                | 026              | 65.17±1.17 ab                   | 35.39±3.95 fg       | 15.32±4.64defghij                     | 79.04±5.46 aacde     | 6.69±0.77 aac                                      | 16.56±0.99 ac         |
| 5                | 021              | 62.65±7.57 ab                   | 58.35±7.56 abcde    | 12.63±6.00fghij                       | 59.34±5.74 aacdefgh  | 6.64±0.55 aacd                                     | 14.99±1.25 acde       |
| 6                | 025              | 71.68±4.02 a                    | 59.26±5.04 abcde    | 15.49±8.68cdefghij                    | 62.54±6.15 aacdefgh  | 4.12±0.72 acdef                                    | 7.97±1.68 fghijklm    |
| 7                | 033              | 65.20±2.75 ab a                 | 59.14±3.47 abcde    | 18.09±0.59 acdefghij                  | 57.88±4.03 acdefgh   | 4.27±0.38 acdef                                    | 4.97±1.09 lm          |
| 8                | 038              | 73.08±4.06 a                    | 64.93±7.08 abc      | 16.23±3.28 cdefghij                   | 64.89±11.93 aacdefgh | 3.62±0.57 acdef                                    | 12.52±2.23 cdefghij   |
| 9                | 046              | 72.12±7.41 a                    | 60.87±4.30 abcde    | 9.60±0.53 j                           | 72.23±5.13 aacdefg   | 5.63±1.25 acdef                                    | 11.03±1.83 cdefghijkl |
| 10               | 052              | 71.45±4.36 a                    | 56.44±4.82 abcde    | 27.44±4.59 aacd                       | 41.57±8.78 gh        | 2.24±0.38 def                                      | 8.52±1.17 efghijklm   |
| 11               | 062              | 68.62±4.51 ab                   | 58.14±1.70 abcde    | 17.03±2.83 cdefghij                   | 42.53±6.30 fgh       | 5.04±0.35 acdef                                    | 6.99±1.32 hijklm      |
| 12               | 065              | 67.51±2.83 ab                   | 58.47±9.28 abcde    | 18.48±6.69 acdefghij                  | 62.15±5.54 aacdefgh  | 7.83±0.71 aa                                       | 14.45±2.97 cdef       |
| 13               | 070              | 64.79±2.25 ab                   | 52.61±13.40 abcdefg | 19.78±3.14 acdefghij                  | 88.88±6.37 aa        | 4.12±0.44 acdef                                    | 26.16±3.84 a          |
| 14               | 071              | 74.99±3.03 a                    | 57.81±7.89 abcde    | 12.26±2.22 fghij                      | 70.12±13.48 aacdefg  | 3.71±0.07 acdef                                    | 13.44±1.18 cdefgh     |
| 15               | 075              | 73.31±4.62 a                    | 64.69±3.82 abc      | 10.48±2.10 hij                        | 35.59±16.83 h        | 9.82±0.69 a                                        | 13.03±2.42 cdefghi    |
| 16               | 079              | 69.67±3.39 ab                   | 59.74±4.81 abcde    | 15.92±2.82 cdefghij                   | 67.25±7.59 aacdefgh  | 6.18±1.18 aacdef                                   | 7.51±1.33 ghijklm     |
| 17               | 080              | 66.10±2.12 ab                   | 55.92±2.82 abcde    | 33.87±2.46 a                          | 68.43±7.74 aacdefgh  | 4.49±0.31 acdef                                    | 6.56±1.19 ijklm       |
| 18               | 083              | 64.71±4.57 ab                   | 53.50±5.88 abcdefg  | 19.52±8.34 acdefghij                  | 48.46±6.93 defgh     | 4.88±0.46 acdef                                    | 12.9±1.65 cdefghi     |
| 19               | 087              | 73.15±7.71 a                    | 55.34±6.17 abcde    | 15.26±5.34 defghij                    | 56.89±9.08 acdefgh   | 6.46±1.07 aacde                                    | 12.90±0.49 cdefghi    |
| 20               | 105              | 66.42±3.75 ab                   | 60.22±3.45 abcde    | 15.08±3.79 defghij                    | 67.75±6.81 aacdefgh  | 6.45±0.56 aacde                                    | 11.49±2.20 cdefghijk  |
| 21               | 106              | 64.16±2.41 ab                   | 43.20±5.99 defg     | 16.10±1.96 cdefghij                   | 70.46±5.06 aacdefg   | 6.33±0.43 aacdef                                   | 11.74±3.10 cdefghijk  |
| 22               | 108              | 68.76±1.37 ab                   | 58.67±1.17 abcde    | 12.40±2.80 fghij                      | 47.83±6.59 defgh     | 5.27±1.74 acdef                                    | 12.13±0.83 cdefghij   |
| 23               | 109              | 75.38±2.65 a                    | 70.03±2.08 a        | 18.21±8.49 acdefghij                  | 55.53±6.03 acdefgh   | 4.03±2.20 acdef                                    | 13.55±2.99 cdefgh     |
| 24               | 113              | 68.83±3.33 ab                   | 46.71±2.87 cdefg    | 13.01±2.48 efghij                     | 87.36±10.81 aa       | 4.86±0.51 acdef                                    | 20.68±2.43 a          |
| 25               | 115              | 71.13±5.63 a                    | 53.43±6.79 abcdefg  | 17.28±3.25 cdefghij                   | 57.27±5.26 acdefgh   | 4.22±0.08 acdef                                    | 12.56±1.57 cdefghij   |
| 26               | 116              | 73.55±8.23 a                    | 65.43±4.15 abc      | 33.76±6.38 a                          | 76.00±4 aacdefg      | 5.43±0.37 acdef                                    | 7.98±1.73 fghijklm    |
| 27               | 118              | 73.45±6.92 a                    | 59.00±7.14 abcde    | 20.36±8.71 acdefghij                  | 43.88±9.14 fgh       | 6.35±0.82 aacdef                                   | 13.03±1.19 cdefghi    |
| 28               | 125              | 72.61±6.07 a                    | 56.87±5.08 abcde    | 28.20±2.45 aac                        | 80.76±12.9 aacd      | 4.56±0.74 acdef                                    | 6.09±1.68 jklm        |
| 29               | 129              | 72.47±6.23 a                    | 62.12±8.77 abcd     | 12.90±0.63 efghij                     | 55.58±4.54 acdefgh   | 3.25±0.98 cdef                                     | 9.53±0.59 defghijklm  |
| 30               | 138              | 71.30±10.45 a                   | 50.98±7.14 aacdefg  | 10.16±4.65 ij                         | 70.02±7.94 aacdefg   | 3.47±0.37 acdef                                    | 8.62±1.2 efghijklm    |
| 31               | 139              | 70.09±4.42 a                    | 58.64±6.69 aacde    | 25.13±6.27 aacdef                     | 74.98±5.16 aacdefg   | 2.87±0.09 cdef                                     | 4.78±0.05 lm          |
| 32               | 146              | 67.48±11.70 ab                  | 48.04±6.66 acdefg   | 22.27±5.73 aacdefghij                 | 54.51±14.79 acdefgh  | 1.97±0.65 f                                        | 3.49±1.89 m           |
| 33               | 149              | 66.02±6.20 aa                   | 62.11±6.95 aacd     | 11.14±1.41 ghij                       | 61.70±9.17 aacdefgh  | 5.44±2.07 acdef                                    | 11.51±1.88 cdefghijk  |
| 34               | 153              | 76.17±9.33 a                    | 42.07±6.13 efg      | 22.73±3.16 aacdefghi                  | 69.22±3.13 aacdefgh  | 5.22±2.25 acdef                                    | 9.82±0.31 defghijklm  |
| 35               | 164              | 62.19±8.96 aa                   | 59.37±5.41 aacde    | 25.76±4.29 aacde                      | 50.63±7.58 defgh     | 3.24±2.18 cdef                                     | 4.99±0.53 lm          |
| 36               | 194              | 68.67±7.46 aa                   | 58.85±2.63 aacde    | 14.26±1.10 efghij                     | 68.86±4.00 aacdefgh  | 2.20±0.70 ef                                       | 13.42±1.57 cdefgh     |
| 37               | 197              | 71.45±5.01 a                    | 57.73±5.73 aacde    | 16.05±5.22 cdefghij                   | 65.00±10.31 aacdefgh | 3.51±0.29 acdef                                    | 14.23±1.77 cdef       |
| 38               | 200              | 54.17±4.81 a                    | 41.88±8.88 efg      | 30.51±8.18 aa                         | 47.50±3.83 defgh     | 4.45±1.08 acdef                                    | 4.63±0.71lm           |

|    |     |               |                     |                       |                     |                 |                      |
|----|-----|---------------|---------------------|-----------------------|---------------------|-----------------|----------------------|
| 39 | 201 | 66.97±2.80 aa | 64.01±1.58 aac      | 21.93±2.16 aacdefghij | 59.90±5.75 aacdefgh | 4.18±0.47 acdef | 11.73±2.85 cdefghijk |
| 40 | 206 | 65.09±2.77 aa | 52.35±5.28 aacdefg  | 14.92±7.76 defghij    | 92.94±1.39 a        | 5.65±0.30 acdef | 9.57±2.47 defghijklm |
| 41 | 211 | 67.51±2.83 aa | 51.23±8.32 aacdefg  | 21.60±1.51 aacdefghij | 76.83±9.33 aacdef   | 4.55±0.08 acdef | 5.47±1.43klm         |
| 42 | 228 | 73.17±1.73 a  | 64.15±5.23 aac      | 13.01±1.72 efghij     | 44.82±4.89 efgh     | 4.07±1.79 acdef | 9.45±1.62 defghijklm |
| 43 | 238 | 71.66±3.69 a  | 51.78±10.15 aacdefg | 15.34±2.18 defghij    | 55.83±8.50 acdefgh  | 6.46±1.81 aacde | 7.85±1.12fghijklm    |
| 44 | 243 | 64.78±4.33 aa | 53.93±8.55 aacdefg  | 11.54±2.51 ghij       | 70.87±6.67 aacdefg  | 4.30±0.21 acdef | 13.77±1.20 cdefg     |
| 45 | 246 | 73.62±2.56 a  | 47.18±9.64 acdefg   | 16.81±6.16 cdefghij   | 72.41±2.82 aacdefg  | 3.41±0.72cdef   | 4.92±1.79lm          |
| 46 | 254 | 71.15±5.41 a  | 63.10±2.06 aacd     | 16.77±4.50 cdefghij   | 70.05±8.07 aacdefg  | 3.06±1.10cdef   | 15.69±1.12 acd       |
| 47 | 258 | 74.91±6.02 a  | 60.46±6.36 aacde    | 20.49±0.70 acdefghij  | 71.05±23.88 aacdefg | 4.82±0.85 acdef | 5.44±1.12klm         |
| 48 | 263 | 71.28±2.88 a  | 67.15±2.07 aa       | 23.13±6.94 aacdefgh   | 51.97±5.03 cdefg    | 3.02±0.94cdef   | 6.63±0.69ijklm       |
| 49 | 266 | 71.17±6.33 a  | 62.79±9.76 aacd     | 21.41±4.60 acdefghij  | 63.11±9.87 aacdefgh | 6.79±0.78 aac   | 12.58±1.48 cdefghij  |
| 50 | 267 | 76.51±3.01 a  | 35.14±5.36 g        | 23.98±4.59 aacdefg    | 78.97±0.35 aacde    | 2.84±0.54cdef   | 14.69±2.21 cde       |

Note: Significant differences between different Chinese fir clones are indicated by different letters in the same column ( $P < 0.05$ ).

**Table S2.** The membership values of each indicator and the evaluations of drought tolerance among 50 Chinese fir clones.

| Serial number | Clones number | Value of membership function of each indicator |                       |             | Membership function mean | Drought resistant sorting |
|---------------|---------------|------------------------------------------------|-----------------------|-------------|--------------------------|---------------------------|
|               |               | Leaf Relative Water Content                    | Relative conductivity | MDA content |                          |                           |
| 1             | 007           | 0.6234                                         | 0.7345                | 0.7046      | 0.6875                   | 14                        |
| 2             | 014           | 0.6605                                         | 0.6782                | 0.5735      | 0.6374                   | 29                        |
| 3             | 017           | 0.5962                                         | 0.3895                | 0.6308      | 0.5388                   | 41                        |
| 4             | 026           | 0.2499                                         | 0.5033                | 0.4104      | 0.3879                   | 50                        |
| 5             | 021           | 0.5224                                         | 0.7304                | 0.4478      | 0.5669                   | 38                        |
| 6             | 025           | 0.7376                                         | 0.6437                | 0.7626      | 0.7147                   | 7                         |
| 7             | 033           | 0.5908                                         | 0.6307                | 0.8192      | 0.6802                   | 19                        |
| 8             | 038           | 0.8502                                         | 0.6080                | 0.6944      | 0.7175                   | 6                         |
| 9             | 046           | 0.7704                                         | 0.6806                | 0.5995      | 0.6835                   | 16                        |
| 10            | 052           | 0.6920                                         | 0.5802                | 0.8704      | 0.7142                   | 8                         |
| 11            | 062           | 0.6530                                         | 0.7863                | 0.7256      | 0.7216                   | 5                         |
| 12            | 065           | 0.6328                                         | 0.5855                | 0.3839      | 0.5341                   | 42                        |
| 13            | 070           | 0.4879                                         | 0.3256                | 0.3629      | 0.3921                   | 49                        |
| 14            | 071           | 0.7909                                         | 0.6442                | 0.6687      | 0.7012                   | 10                        |
| 15            | 075           | 0.8519                                         | 0.9819                | 0.2885      | 0.7074                   | 9                         |
| 16            | 079           | 0.6995                                         | 0.5938                | 0.6417      | 0.6450                   | 27                        |
| 17            | 080           | 0.5649                                         | 0.2137                | 0.7697      | 0.5161                   | 43                        |
| 18            | 083           | 0.4990                                         | 0.6834                | 0.6058      | 0.5961                   | 31                        |
| 19            | 087           | 0.7144                                         | 0.6976                | 0.5050      | 0.6390                   | 28                        |
| 20            | 105           | 0.6336                                         | 0.6067                | 0.5367      | 0.5923                   | 34                        |
| 21            | 106           | 0.3389                                         | 0.5622                | 0.5391      | 0.4801                   | 46                        |
| 22            | 108           | 0.6636                                         | 0.8356                | 0.5980      | 0.6991                   | 11                        |
| 23            | 109           | 0.9747                                         | 0.6489                | 0.6458      | 0.7565                   | 4                         |
| 24            | 113           | 0.4939                                         | 0.4784                | 0.4363      | 0.4695                   | 47                        |
| 25            | 115           | 0.6417                                         | 0.6527                | 0.6551      | 0.6498                   | 24                        |
| 26            | 116           | 0.8678                                         | 0.1500                | 0.6791      | 0.5656                   | 39                        |
| 27            | 118           | 0.7736                                         | 0.7026                | 0.5093      | 0.6630                   | 22                        |
| 28            | 125           | 0.7241                                         | 0.2231                | 0.7761      | 0.5744                   | 35                        |
| 29            | 129           | 0.7963                                         | 0.7578                | 0.7836      | 0.7792                   | 2                         |
| 30            | 138           | 0.6103                                         | 0.6882                | 0.7898      | 0.6961                   | 12                        |
| 31            | 139           | 0.6930                                         | 0.3365                | 0.9120      | 0.6472                   | 26                        |
| 32            | 146           | 0.4828                                         | 0.5740                | 0.9983      | 0.6850                   | 15                        |
| 33            | 149           | 0.6516                                         | 0.7406                | 0.6008      | 0.6643                   | 20                        |
| 34            | 153           | 0.5917                                         | 0.4362                | 0.6519      | 0.5599                   | 40                        |
| 35            | 164           | 0.5266                                         | 0.5360                | 0.8839      | 0.6488                   | 25                        |
| 36            | 194           | 0.6644                                         | 0.6139                | 0.7652      | 0.6812                   | 18                        |
| 37            | 197           | 0.7105                                         | 0.6107                | 0.6637      | 0.6616                   | 23                        |
| 38            | 200           | 0.0966                                         | 0.4655                | 0.8153      | 0.4592                   | 48                        |
| 39            | 201           | 0.7002                                         | 0.5341                | 0.6764      | 0.6369                   | 30                        |
| 40            | 206           | 0.4910                                         | 0.3904                | 0.6299      | 0.5038                   | 45                        |
| 41            | 211           | 0.5291                                         | 0.3933                | 0.7902      | 0.5709                   | 36                        |
| 42            | 228           | 0.8411                                         | 0.8493                | 0.7331      | 0.8078                   | 1                         |
| 43            | 238           | 0.6300                                         | 0.4619                | 0.6159      | 0.5692                   | 37                        |
| 44            | 243           | 0.5066                                         | 0.6524                | 0.6236      | 0.5942                   | 33                        |
| 45            | 246           | 0.6079                                         | 0.5305                | 0.9080      | 0.6821                   | 17                        |
| 46            | 254           | 0.7808                                         | 0.5517                | 0.6604      | 0.6643                   | 21                        |

|    |     |        |        |        |        |    |
|----|-----|--------|--------|--------|--------|----|
| 47 | 258 | 0.8271 | 0.4666 | 0.7738 | 0.6891 | 13 |
| 48 | 263 | 0.8418 | 0.5784 | 0.8624 | 0.7609 | 3  |
| 49 | 266 | 0.7768 | 0.5168 | 0.4910 | 0.5949 | 32 |
| 50 | 267 | 0.5000 | 0.3256 | 0.6966 | 0.5074 | 44 |

**Table S3.** The name, number and culture conditions of leaf samples for transcriptome analysis.

| Sample Name                             | Organ | Numbering | Culture Conditions |
|-----------------------------------------|-------|-----------|--------------------|
| High drought-tolerant capacity: NO. 228 | Leaf  | A_1-A_3   | Drought Treatment  |
|                                         |       | B_1-B_3   | Normal Culture     |
| Low drought-tolerant capacity: NO. 026  | Leaf  | C_1-C_3   | Drought Treatment  |
|                                         |       | D_1-D_3   | Normal Culture     |

Note: Each sample is organized into 3 biological replicates, numbered 1-3.

**Table S4.** Number of drought-related transcription factors by species

| Name                              | AP2 | ARF | BES1 | GRAS | MYB | NAC | WRKY | bHLH | bZIP |
|-----------------------------------|-----|-----|------|------|-----|-----|------|------|------|
| <i>Arabidopsis thaliana</i>       | 30  | 37  | 14   | 37   | 168 | 138 | 90   | 225  | 127  |
| <i>Zea mays</i>                   | 54  | 62  | 17   | 104  | 203 | 189 | 161  | 308  | 216  |
| <i>Gossypium hirsutum</i>         | 59  | 69  | 24   | 164  | 441 | 306 | 238  | 427  | 224  |
| <i>Nicotiana tabacum</i>          | 93  | 87  | 27   | 126  | 319 | 280 | 210  | 435  | 210  |
| <i>Populus trichocarpa</i>        | 59  | 98  | 32   | 151  | 266 | 289 | 185  | 379  | 214  |
| <i>Selaginella moellendorffii</i> | 10  | 7   | 5    | 54   | 24  | 22  | 19   | 55   | 25   |
| <i>Vitis vinifera</i>             | 19  | 17  | 6    | 43   | 138 | 71  | 59   | 115  | 47   |
| <i>Salvia miltiorrhiza</i>        | 23  | 15  | 6    | 34   | 116 | 87  | 77   | 151  | 62   |
| <i>Prunus persica</i>             | 25  | 40  | 17   | 83   | 163 | 186 | 85   | 282  | 157  |
| <i>Cunninghamia lanceolata</i>    | 470 | 85  | 32   | 194  | 647 | 229 | 224  | 368  | 237  |

Note: The numbers of *Cunninghamia lanceolata* transcription factors were obtained from the transcriptome sequencing data, and other species were obtained from the PlantTFDB v5.0 (<http://planttfdb.cbi.pku.edu.cn/>)..

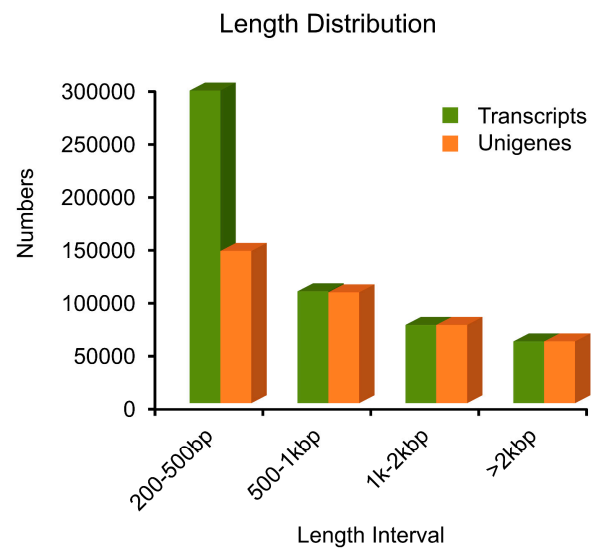

**Fig. S1.** Frequency distribution and gene annotation of different splicing lengths among different Chinese fir clones. The abscissa is the splice transcript/gene length interval, and the ordinate is the numbers of occurrences of splice transcripts/genes of each length.

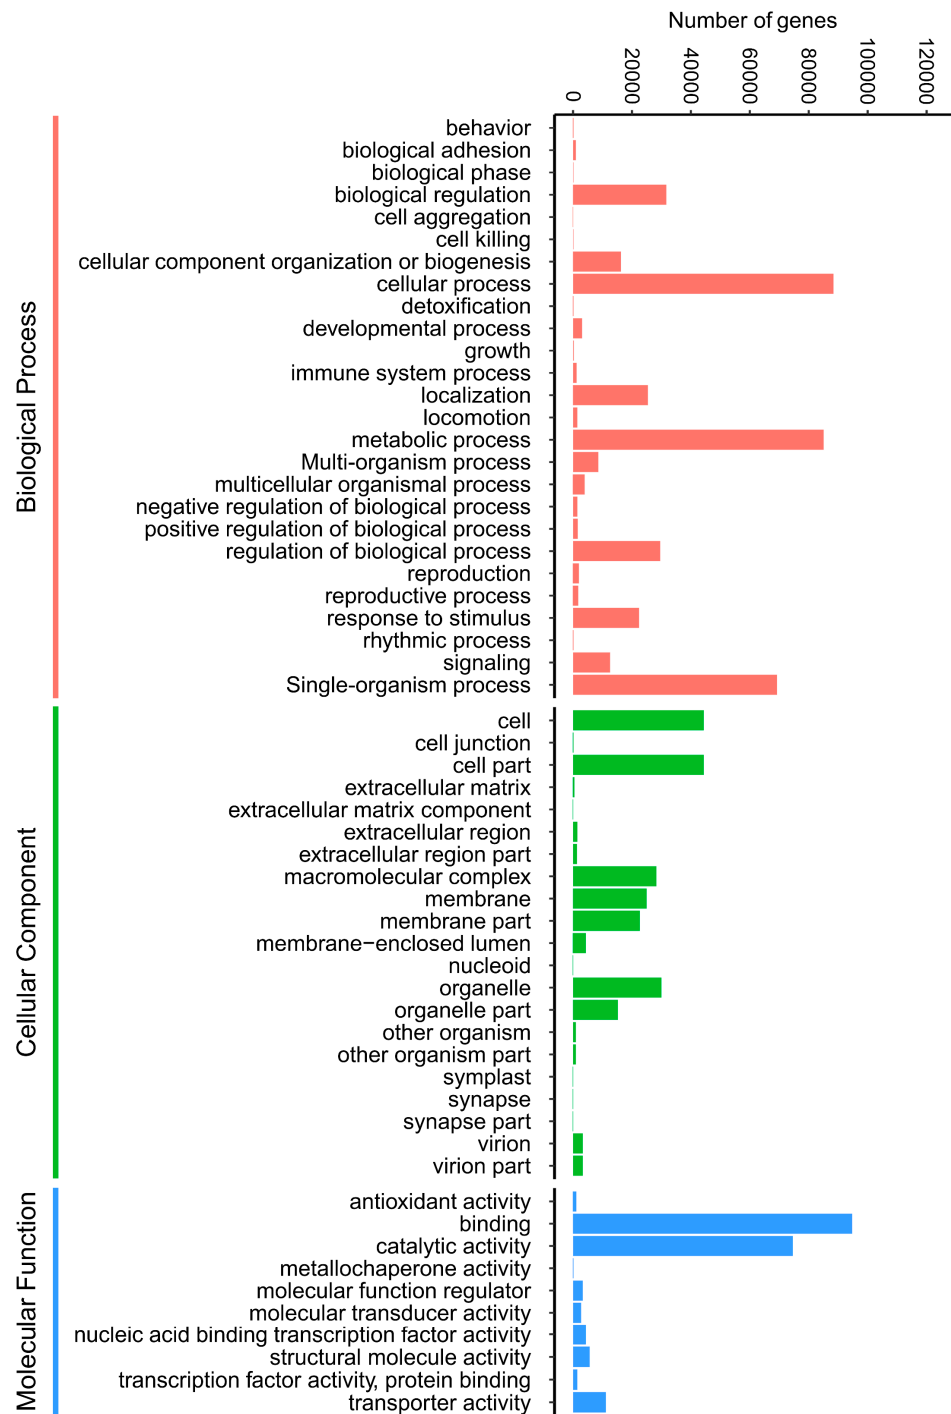

**Fig. S2.** Gene functional classification in GO database among different Chinese fir clones. The classifications are shown in three main categories and fifty seven groups. The three classifications represent the three basic classifications of Go term (from top to bottom are biological processe, cellular component, and molecular function).

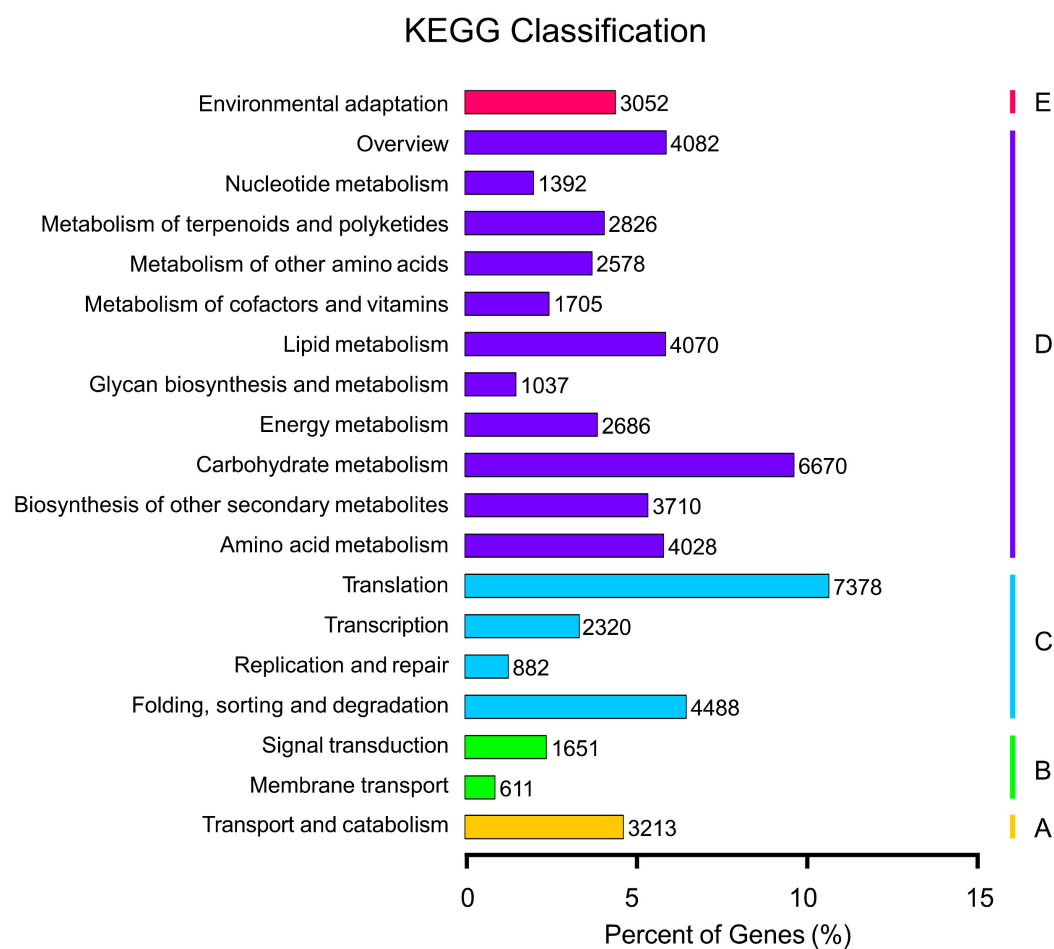

**Fig. S3.** Gene functional classifications in KEGG database among different Chinese fir clones. The genes of Chinese fir leaves involved in KEGG metabolic pathway can be divided into 5 categories and 19 secondary branches.

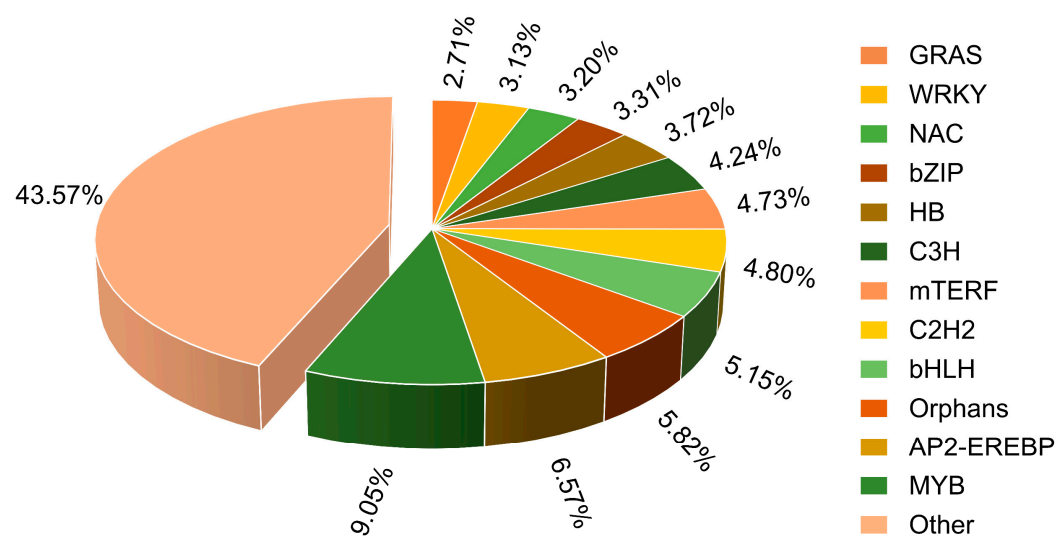

**Fig. S4.** Classifications of transcription factors of leaves among different Chinese fir clones.



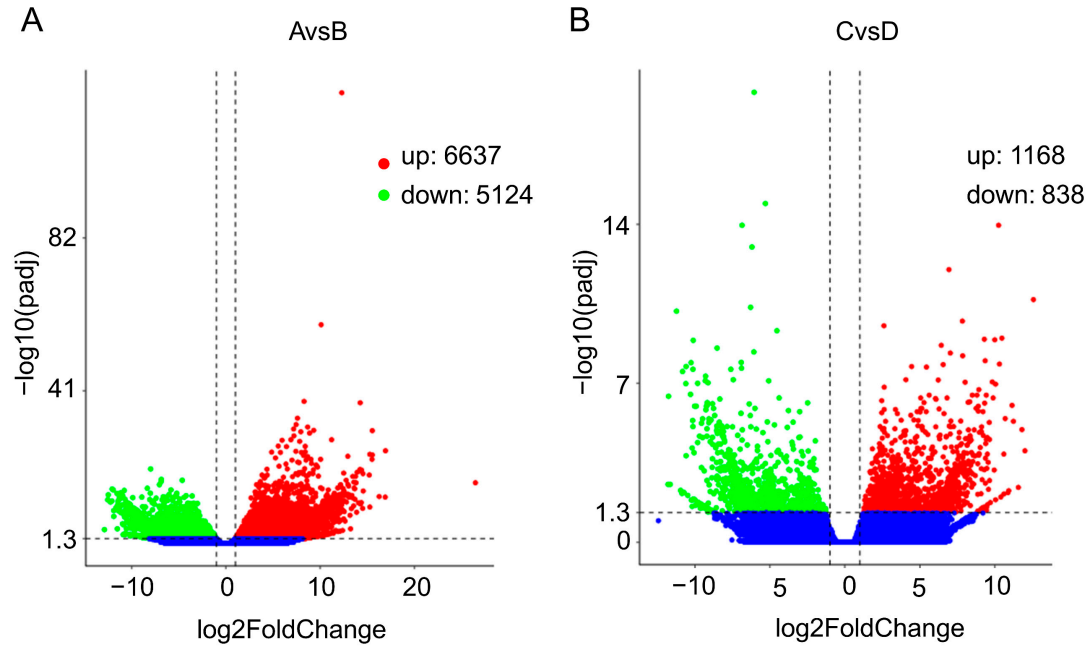

**Fig. S5.** Analysis of differentially expressed genes (DEGs) of the same Chinese fir clone under drought stress and normal culture. The screening conditions for differential genes were  $\text{padj} < 0.05$  and  $|\log_2\text{FoldChange}| > 1$ . Abscissa is the change of gene expression multiple in different samples; ordinate is the statistical significance of the change of gene expression. The greater the  $-\log_{10}$  is, the more significant difference is between drought stress and CK. Dot represents gene, and blue dots represent no significant difference. Red dots represent significant up regulation, and green dots represent significant down regulation. A, C are leaf DEGs in No. 228 and No. 026 under drought stressed, and B, D are leaf DEGs in No. 228 and No. 026 under normal conditions.

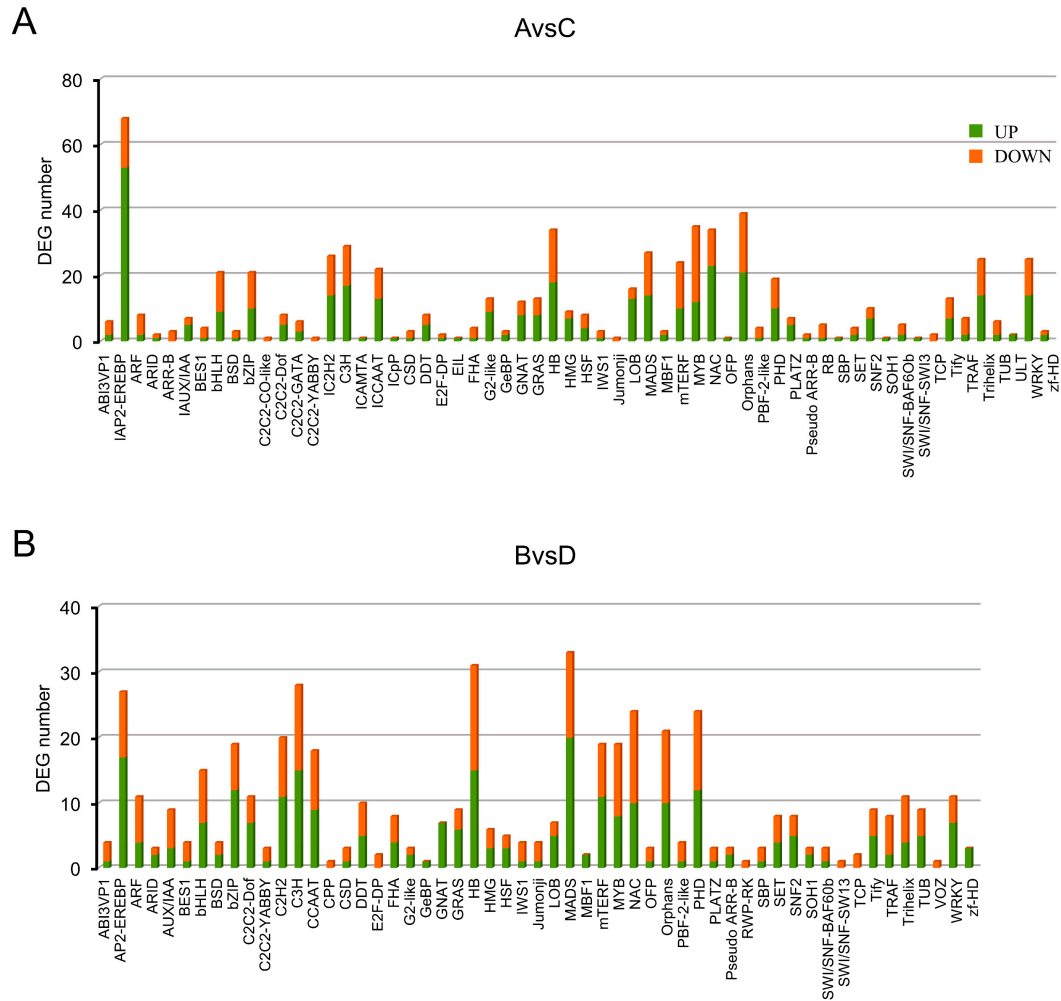

**Fig. S6.** Differential expressions of transcription factors among different Chinese fir clones under drought stress. The abscissa is the type of transcription factors that are differentially expressed in different comparison groups, and the ordinate is the number of transcription factors. A vs C were the comparisons of leaf DEGs between No. 228 and No. 026 under drought stress, and B vs D were the comparisons of leaf DEGs between No. 228 and No. 026 under normal conditions.

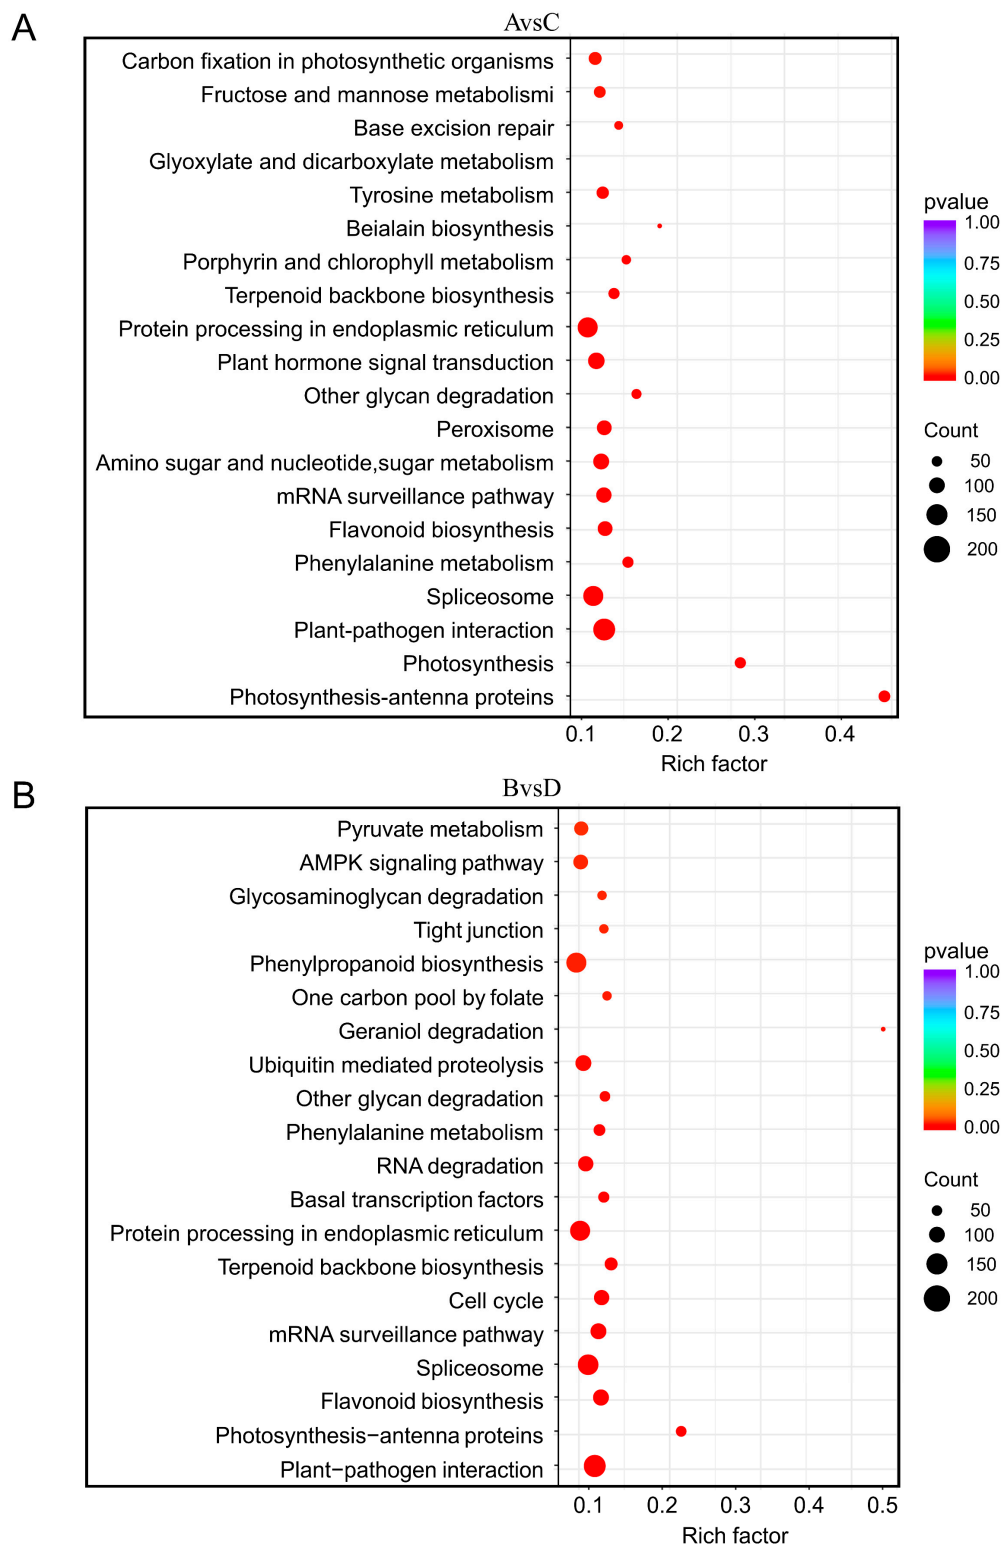

**Fig. S7.** The scatter plot of differential gene in KEGG pathway enrichment. The ordinate represents the name of the pathway, and the abscissa represents the rich factor corresponding to the pathway. The p-value is represented by the dot color, and the smaller the p-value is, the color is closer to red. The number of differential genes contained in each pathway is expressed by the dot size. A vs C were the comparisons of leaf DEGs between No. 228 and No. 026 under drought stress, and B vs D were the comparisons of leaf DEGs between No. 228 and No. 026 under normal conditions.
